# Supplementary material for: Interval estimation of the overall treatment effect in a meta-analysis of a few small studies with zero events
Source: PubMed Central journal article supplement (PMC5898531; doi:10.1016/j.conctc.2017.11.012), 2018-01-09
Supplement: mmc3.pdf [file mmc3.pdf]

## Supplementary material A

Table 1: **(1)** Efficacy endpoint : Treatment discontinuation, Therapy : Intravenous immunoglobulin vs Plasma Exchange, Condition : Guillain-Barre syndrome **(2)** Safety endpoint : Vomiting, Therapy : Sapropterin dihydrochloride , Condition : Phenylketonuria,  $P_{event}$  : Observed probability of event in each trial,  $W_{initial}$  : Weight of original analysis

| Author                                                         | Year | $r_{Ti}$ | $n_{Ti} - r_{Ti}$ | $r_{Ci}$ | $n_{Ci} - r_{Ci}$ | $n_{Ti}$ | $n_{Ci}$ | $P_{event}$ | $W_{initial}$ |
|----------------------------------------------------------------|------|----------|-------------------|----------|-------------------|----------|----------|-------------|---------------|
| <b>(1)</b> Guillain-Barre syndrome - Treatment discontinuation |      |          |                   |          |                   |          |          |             |               |
| vanderMeche                                                    | 1992 | 0        | 74                | 12       | 61                | 74       | 73       | 0.08        | 0.39          |
| Bril                                                           | 1996 | 0        | 26                | 0        | 24                | 26       | 24       | 0           | 0             |
| PSGBS                                                          | 1997 | 3        | 127               | 18       | 103               | 130      | 121      | 0.09        | 0.58          |
| Nomura                                                         | 2001 | 1        | 22                | 1        | 23                | 23       | 24       | 0.04        | 0.03          |
| <b>(2)</b> Phenylketonuria - Vomiting                          |      |          |                   |          |                   |          |          |             |               |
| Levy                                                           | 2007 | 2        | 39                | 4        | 43                | 41       | 47       | 0.07        | 0.79          |
| Trefz                                                          | 2009 | 4        | 29                | 0        | 12                | 33       | 12       | 0.09        | 0.21          |

Table 2: Analysis of motivating examples. This table presents a treatment effect estimate  $\theta = \log(OR)$ , a between-study variance estimate  $\tau^2$  and the corresponding significance level ( $pv_\theta$ ) of a Wald test on  $\theta$ . LRR: Log Relative Risk,  $I^2$ : relative heterogeneity.

| Characteristics / Studies                  | GBS (Hughes 2014) |          |             | PHK (Somaraju 2015) |          |             |
|--------------------------------------------|-------------------|----------|-------------|---------------------|----------|-------------|
| Number of Studies                          | 4                 |          |             | 2                   |          |             |
| Total Sample                               | 495               |          |             | 133                 |          |             |
| Number of Single Zeros                     | 2                 |          |             | 1                   |          |             |
| Number of Double Zeros                     | 1                 |          |             | 0                   |          |             |
| Init. Analysis (LRR, $I^2$ , $pv_\theta$ ) | -1.96             | 32%      | <0.001      | 0.04                | 44%      | 0.69        |
|                                            | $\theta$          | $\tau^2$ | $pv_\theta$ | $\theta$            | $\tau^2$ | $pv_\theta$ |
| Hunter-Schmidt                             | -1.79             | 0        | <0.01       | -0.10               | 0        | 0.89        |
| Maximum likelihood                         | -1.79             | <0.01    | <0.01       | -0.10               | <0.01    | 0.89        |
| Restricted maximum likelihood              | -1.79             | <0.01    | <0.01       | -0.03               | 0.30     | 0.98        |
| DerSimonian Laird (dl)                     | -1.70             | 0.37     | 0.01        | -0.03               | 0.30     | 0.98        |
| Two step dl                                | -1.69             | 0.46     | 0.01        | -0.03               | 0.30     | 0.98        |
| Positive dl                                | -1.69             | 0.46     | 0.01        | -0.03               | 0.30     | 0.98        |
| Hedges                                     | -1.67             | 0.57     | 0.02        | -0.03               | 0.30     | 0.98        |
| Two step Hedges                            | -1.68             | 0.49     | 0.01        | -0.03               | 0.30     | 0.98        |
| Model error Variance                       | -1.67             | 0.55     | 0.02        | -0.03               | 0.30     | 0.98        |
| Paule Mandel                               | -1.68             | 0.47     | 0.01        | -0.03               | 0.30     | 0.98        |
| Rukhin's Bayes zero                        | -1.68             | 0.52     | 0.02        | -0.03               | 0.29     | 0.97        |
| Hartung-Makambi                            | -1.65             | 0.75     | 0.03        | 0.04                | 0.70     | 0.96        |
| Rukhin Bayes positive                      | -1.57             | 1.78     | 0.09        | 0.05                | 0.77     | 0.96        |
| Positive Sidik & Jonkman                   | -1.60             | 1.29     | 0.06        | 0.04                | 0.70     | 0.96        |
| Improved Paule-Mandel                      | -1.54             | 2.50     | 0.14        | 0.14                | 1.58     | 0.91        |

Table 3: Calibration of probability for observing a trial with at least one zero cell (SZ), with both zero cells (DZ), all trials with at least one zero cell (All SZ), all trials with both zero arms (All DZ) in a MA in (%) under combinations of control group event rates ( $P_c$ ) and treatment effects  $\theta = \log(OR)$  for 2 to 4 studies of 20 to 30 patients per trial arm and low heterogeneity.

|       |          | # studies :               | 2-4       | 2-4       | 2             | 3    | 4    | 2             | 3    | 4 |
|-------|----------|---------------------------|-----------|-----------|---------------|------|------|---------------|------|---|
| $P_c$ | $\theta$ | Sample $U(\alpha, \beta)$ | <i>SZ</i> | <i>DZ</i> | <i>All SZ</i> |      |      | <i>All DZ</i> |      |   |
| 0.05  | 0        | (20-30)                   | 48.59     | 7.91      | 16.24         | 5.16 | 1.57 | 0.65          | 0.07 | 0 |
| 0.10  | 0        | (20-30)                   | 15.25     | 0.60      | 1.45          | 0.18 | 0.02 | 0             | 0    | 0 |
| 0.15  | 0        | (20-30)                   | 4.50      | 0.03      | 0.11          | 0    | 0    | 0             | 0    | 0 |
| 0.05  | 1        | (20-30)                   | 31.08     | 1.18      | 8.45          | 2.39 | 0.81 | 0.02          | 0    | 0 |
| 0.10  | 1        | (20-30)                   | 8.06      | 0.02      | 0.66          | 0.09 | 0.01 | 0             | 0    | 0 |
| 0.15  | 1        | (20-30)                   | 2.25      | 0         | 0.04          | 0    | 0    | 0             | 0    | 0 |

Table 4: Scenarios considered in the simulation study.

| Parameters                                  | Prospective approach  | Retrospective approach |
|---------------------------------------------|-----------------------|------------------------|
| Number of trials ( $k$ )                    | 2, 3, 4               | 4                      |
| Overall treatment effect ( $\theta$ )       | 0, 1                  | 0, 1                   |
| Heterogeneity ( $\tau^2$ )                  | 0, 0.5, 1, 2          | 0, 0.5, 1, 2           |
| Control event rate ( $P_c$ )                | 0.05, 0.06, ..., 0.15 | 0.05, 0.06, ..., 0.15  |
| Trial arm sample size ( $n_{Ci} = n_{Ti}$ ) | (20, 30)              | (20, 30)               |
| Methods ( $\hat{\tau}$ )                    | Fifteen (15)          | Seven (7)              |
